# Supplementary material
Source: PubMed Central journal article supplement (PMC4741340)
Supplement: supp_pp.15.00288_00288suppdata.pdf [file supp_pp.15.00288_00288suppdata.pdf]

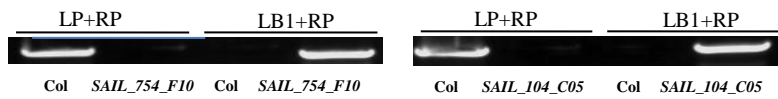

**Supplemental Figure S1.** Identification of *tang1-2* and *tang1-3* mutants. T-DNA insertions were confirmed by PCR using T-DNA-specific and flanking primers (For primer sequences listed in Table S1 in the supplementary material).

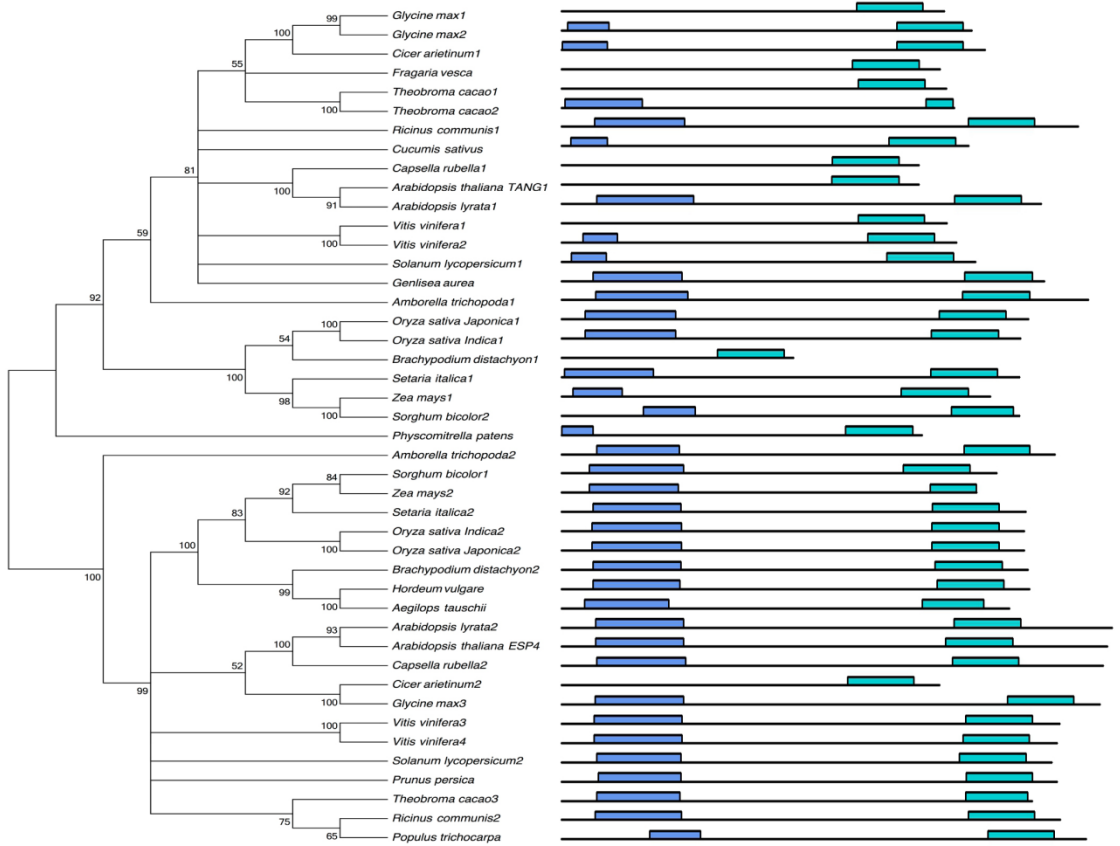

0.1

■ DUF3453    ■ Symplekin C\_terminal

**Supplemental Figure S2.** Phylogenetic tree of TANG1 protein. Neighbour - Joining phylogenetic tree generated by 1,000 replicates of bootstrap analysis of plant TANG1 proteins using MEGA5.2 software.

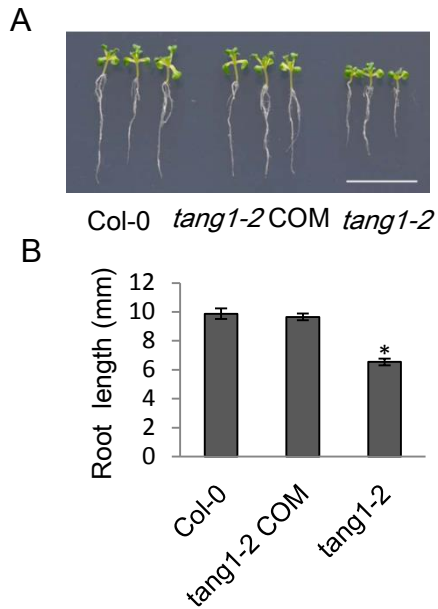

Supplemental Figure S3. Overexpression of *TANG1-GFP* complemented the phenotypes of *tang1-2*.

- A. The phenotype of 12-d-old seedlings of Col-0, *tang1-2* and *tang1-2*COM. *tang1-2*COM is *tang1-2* transformed with the wild-type *TANG1* CDS sequence. Bar = 1 cm.
- B. The root length of 12-d-old seedlings of Col-0, *tang1-2* and *tang1-2*COM. \*P < 0.05 compared with Col-0 (One Way ANOVA). Data represents mean  $\pm$  SD (n > 15).

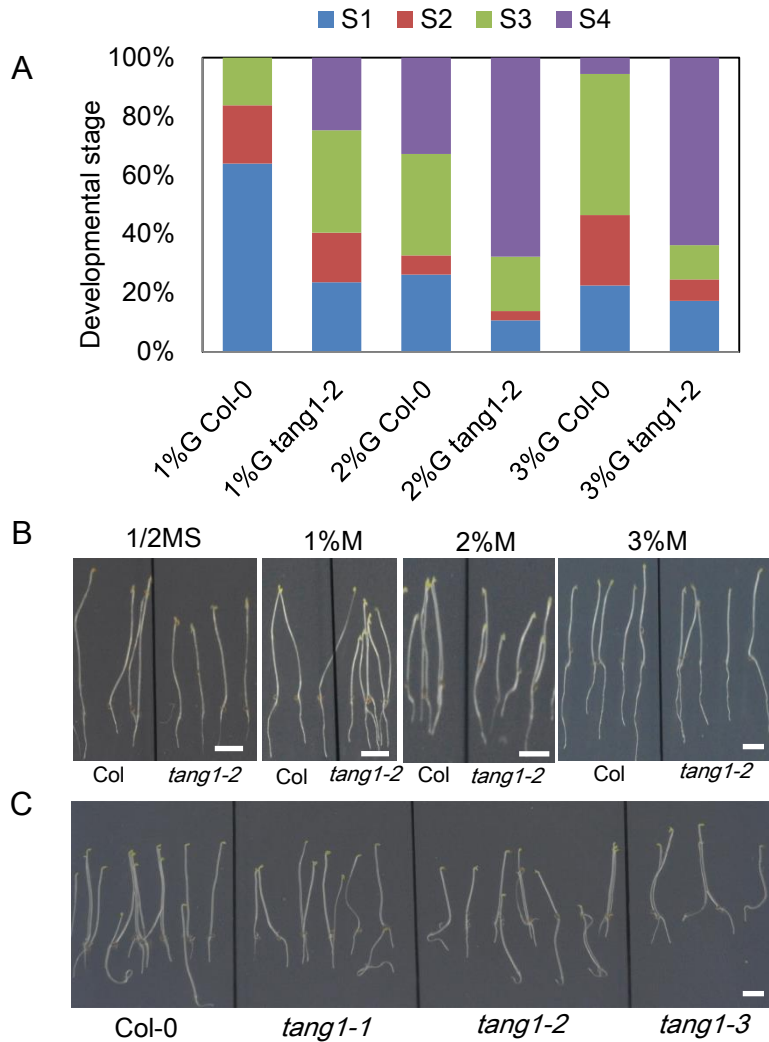

**Supplemental Figure S4.** Dark development analysis of *tang1* mutants.

- A. The comparison of development stages between *tang1-2* mutant and Col-0. Seedlings were grown on media with glucose as indicated in the dark for 16 days (n > 50).
- B. Dark development phenotype of seedlings grown on media without sugar. The plants were grown on 1/2 MS, or 1/2 MS supplemented with different concentration of mannitol as indicated for 16 days. Bar = 0.5cm.
- C. Dark development phenotype of Col-0 and *tang1* mutants grown on 1/2 MS media containing 3% M for 16 days. Bar = 0.5cm.

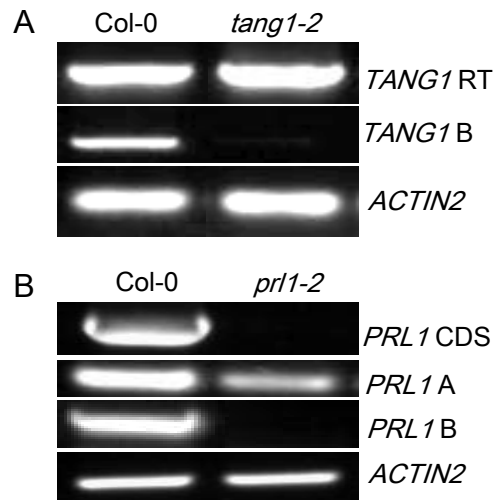

Supplemental Figure S5. Expression analysis of *PRL1* and *TANG1* gene in *prl1-2* and *tang1-2*, respectively.

- A. Expression analysis of *TANG1* in *tang1-2* mutant. cDNA was prepared from 14-d-old wild-type Col-0 and *tang1-2* seedlings. The *ACTIN2* gene was used as a reference for the relative mRNA levels.
- B. Expression analysis of *PRL1* in *prl1-2* mutant. cDNA was prepared from 20-d-old Col-0 and *prl1-2* seedlings. The *ACTIN2* gene was used as a reference for the relative mRNA levels.

Table S1. Primers used for T-DNA identification

| Primer                       | Forward                           | Reverse               |
|------------------------------|-----------------------------------|-----------------------|
| <i>tang1-2(SAIL_754_F10)</i> | AAAACATGCGTTAGGAACACG             | GCTGTCAATTCTGGCTACCAC |
| <i>tang1-3(SAIL_104_C05)</i> | CTGCAATGTGACAGGATTTG              | TGCAGCATCAGACATTACTGC |
| LB1                          | GCCTTTCAGAAATGGATAAATAGCCTTGCTTCC |                       |

Table S2. Markers used in *TANG1* mapping

| Marker             | Forward primer         | Reverse primer          | Restriction enzyme |
|--------------------|------------------------|-------------------------|--------------------|
| T17H3              | TACAGGATTACCATATGCATGG | AAGAGCAAGCTCAAACCTAAGC  |                    |
| CIW12              | AGGTTTTATTGCTTTTCACA   | CTTCAAAAAGCACATCACA     |                    |
| Indel-1            | GTATTTTGGCTTTCCACTAGG  | AGAATAACCAATCAAACCTAAAC |                    |
| SNP-1              | TGCCATCAGAGTTCAAATGTC  | TCTTTATGGGGTTTCATATGTC  |                    |
| At1g27595CAPS      | CAGGATCTACAAACTTCTCGT  | TGGATAGCAATCAGTACCTCG   | HindIII            |
| *At1g27595splicing | CAGGATCTACAAACTTCTCGT  | TCTCCTCCAATAACTTCAACT   |                    |

\*primer used for checking *tang1-1* alternative splicing.

Table S3. Primers used for plasmid construction

| Primer      | Sequences                                            |
|-------------|------------------------------------------------------|
| TANG1gBPF   | ggggacaagttgtacaaaaagcaggctGGAGGAGATGGCAATGCAGGTC    |
| TANG1gBPR   | ggggaccactttgtacaagaagctgggtCTTCGGACATTGATGATTCCACAG |
| TANG1pBPF   | ggggacaagttgtacaaaaagcaggctTTATAGCACCAGTTCAACCCCT    |
| TANG1pBPR   | ggggaccactttgtacaagaagctgggtTATTCGTTTCTTTGACAGATCC   |
| TANG1CDSFB1 | ggggacaagttgtacaaaaagcaggct ATGCCCCAGGGTGAAGATGAT    |
| TANG1CDSRB2 | ggggaccactttgtacaagaagctgggt CGTTAAGCCGCCCCATAA      |

Notes: lower case sequences represent the Gateway adaptors



Table S4. Primers used for RT-PCR and quantitative real-time RT-PCR

| Primer          | Forward                   | Reverse                   |
|-----------------|---------------------------|---------------------------|
| Tang1RT         | TATACCGTGCATTCTCCGACTC    | CCGTTCAATAGCCAACCTTTCC    |
| TangQRT         | CCTTCCCTCACTGCTTATGCGAATC | CCGCCCCATGAATAGACGAAGTTG  |
| ACTIN2          | ATCACCGCTCTTGACCTAGCA     | TTCCTGTGAACAATCGATGGACCTG |
| CAB4            | GTCAACGGACGATGGGCTAT      | CCAGCATCGTACCACTCAGGA     |
| SIS3            | TTGTTGACAATGGTCTTGCTTC    | AAGCCCACAGAAATGGATACAG    |
| HXK1            | GAATCCAGGCGAACAGATTCTTGAG | GTGCATAGCCGACATGTGAGGAG   |
| TPS1            | GGTGTCAAAAGGGAGCTGC       | CATCTTCGTCCTTCCCAAG       |
| RGS1            | TTTCTCCCCCTTGTTTTGTT      | ATGAAGGCCTGCAACTGGG       |
| GPA1            | TGAACGTTTGCGAGTGGTTC      | GGCGCCGTGTTCTGGTAATA      |
| AKIN10          | TCCCCGTGAAATAATGACGG      | CATACCATCTGCGCTGCTGT      |
| AKIN11          | TCCTATGCGCACACCTGAAG      | TCCAAGAGCCATTTTCGAT       |
| PRL1            | GGATGGTGTGATGGTCACTG      | GATTCCAACAAGAGCTTTGAGTT   |
| APL3            | CACACGGATGTTTCTTGGA       | GGTAACTATCCGCTCCTAAC      |
| At $\beta$ -Amy | CGGCCGGTGAACACTACGTTATCCT | CCTCCGGCTTGTCATTGTATTCTCC |
| PRL1 CDS        | CACTTCACTTCTCTTTCTCTC     | ATGAAGAGATTAGTGAGATTCC    |
| PRL1 A          | GAACCCATCGAAGCACAGTC      | TGGACCAACAACAATAGCAC      |
| PRL1 B          | CCAGAGTGGCATGCACCATG      | GAAGCGCTAATCTCCTTTGG      |
| TANG1 B         | CAGGATCTACAACTTCTCGT      | TGGATAGCAATCAGTACCTCG     |
